# Supplementary material for: Aurora-A-Dependent Control of TACC3 Influences the Rate of Mitotic Spindle Assembly
Source: PubMed Central journal article supplement (PMC4489650; doi:10.1371/journal.pgen.1005345), 2015-07-02

**Figure S7.**

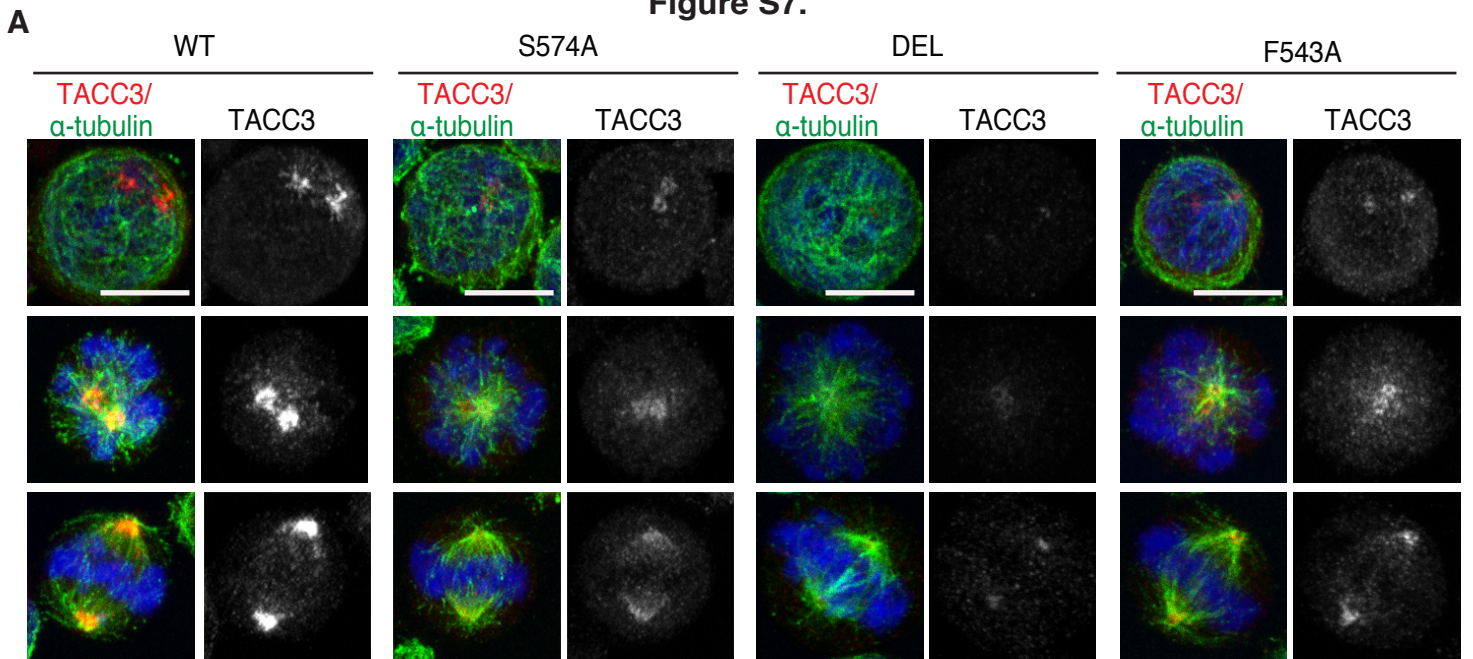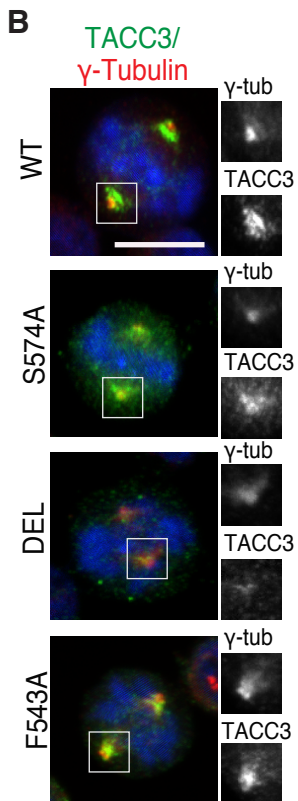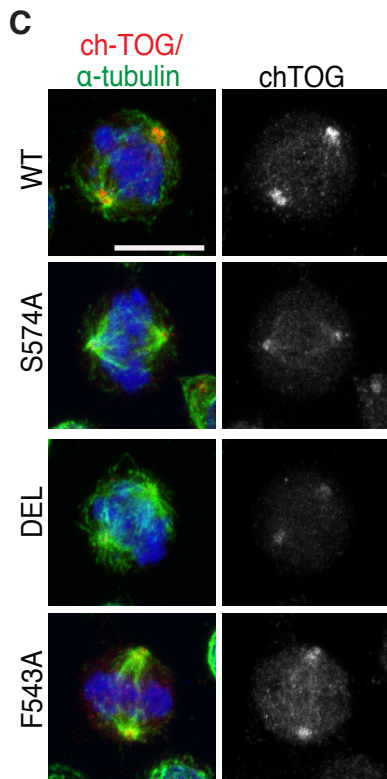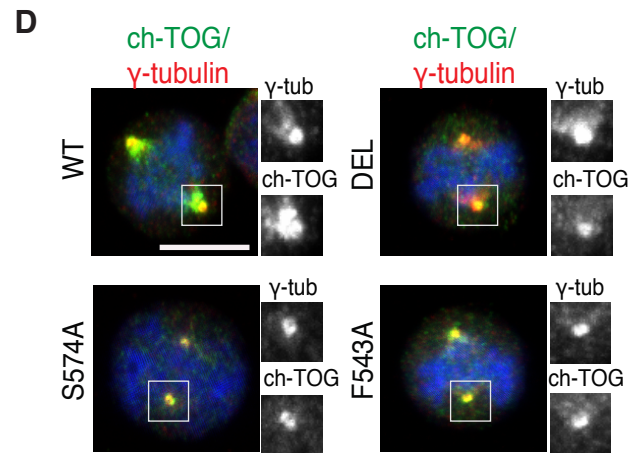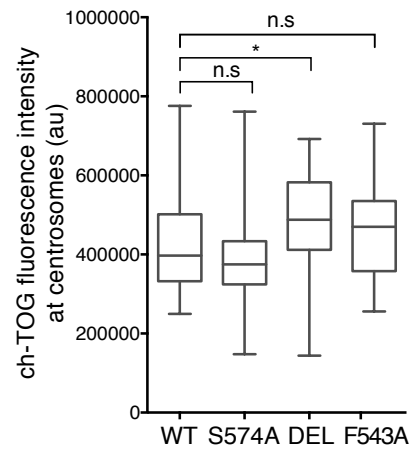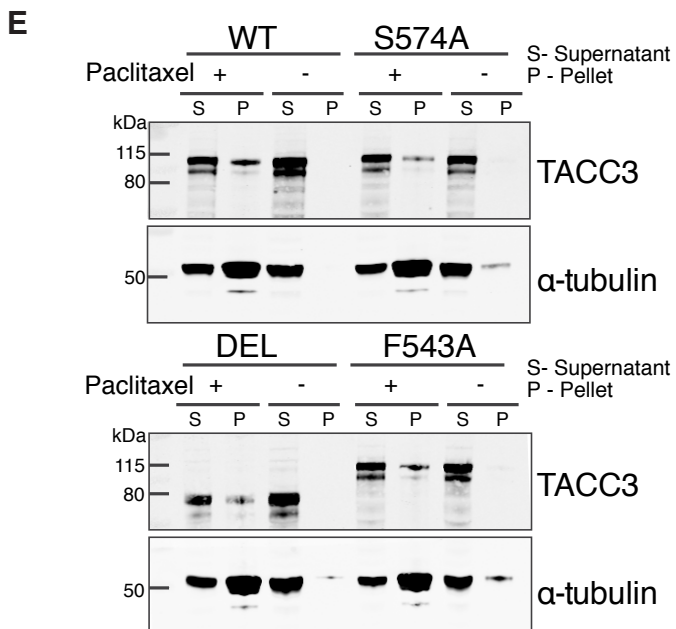

Supplement: pgen.1005345.s007.pdf [file pgen.1005345.s007.pdf]
