# Supplementary material for: Aurora-A-Dependent Control of TACC3 Influences the Rate of Mitotic Spindle Assembly
Source: PubMed Central journal article supplement (PMC4489650; doi:10.1371/journal.pgen.1005345), 2015-07-02
Supplement: pgen.1005345.s010.pdf [file pgen.1005345.s010.pdf]

## Table S1

| Primer                | Alternative name | Sequence (5' – 3')                         |
|-----------------------|------------------|--------------------------------------------|
| Exon4_Fwd             | A                | TCAAGGACAGACTGATCTTCC                      |
| Exon8_Rev             | B                | GACTTGATGTAGGCTTCTCAG                      |
| Blasti_Fwd            | C                | CTCCACACAGGCATAGAGTGTCTGC                  |
| Puro_Fwd              | D                | CGACCGAAAGGAGCGCACGACC                     |
| Exon14_Rev            | E                | GGCTGCAGTTTCTGATTTAGCTTTGTTTCGTACCTGGGCG   |
| Exon10_Rev            | F                | TCCATTCAAGAGCCTCCAACCTC                    |
| Exon9_Rev             | G                | ACTAGTTCAACAGCTGCATCC                      |
| SA-LA-fwd             |                  | accgcggtggcgccGAACCTGAAGAGCTCTTCAGAC       |
| S574A-mutR            |                  | cttcaaatacaa <b>CGCT</b> TGCTTCCTCAAAGC    |
| S574A-mutF            |                  | gcttgaggaagcaa <b>CGCT</b> TGTATTTGAAG     |
| SA-LA-rev             |                  | taggggatccactagCAGAAGTTCGACTTTATATAG       |
| SA-RA-fwd             |                  | ggtaggggatccccATGTACTTAATATTCTTGTAT        |
| SA-RA-rev             |                  | gaattcctgcagcccCACATCAGATGAATTAAGC         |
| FA-LA-Sall-fwd        |                  | gtcgacGGAATAGGGAATCAAGCTTAC                |
| FA-LA-BamHI-rev       |                  | ggatccCTAGATGGTCATTGTGGTCCT                |
| F543A-mutF            |                  | GAACCTGAAGAg <b>ctagc</b> AAGACCATCAGCAGAA |
| F543A-mutR            |                  | TTCTGCTGATGGTCTT <b>gctagc</b> TCTTCAGGTTT |
| FA-RA-BamHI-fwd       |                  | ggatccCTGCACTTACACGTGTGTCTT                |
| FA-RA-NotI-rev        |                  | gcggccgcCCATTCAAGAGCCTCCAACCTC             |
| DEL-LA-KpnI-fwd       |                  | ggtaccTCTCTTCCACTGGATAATAC                 |
| DEL-LA-BamHI-STOP-rev |                  | ggatcc <b>CTA</b> AGTGCTAGCTGTCTGCTGATC    |
| DEL-RA-BamHI-fwd      |                  | ggatccGACGCTATTATAGATGTGCTG                |
| DEL-RA-NotI-rev       |                  | gcggccgcCTAGCCAGATATTCTTCAGCA              |

| Human TACC3 shRNA oligos: (5' – 3'); target sequence is shown in bold |                                                                                                                                                     |
|-----------------------------------------------------------------------|-----------------------------------------------------------------------------------------------------------------------------------------------------|
| TACC3-shRNA2                                                          | ctcgagAAGGTATATTGCTGTTGACAGTGAGCGAAGGAAGTTCTGAGAACCAAAT<br>tagtgaagccacagatgta <b>ATTTGGTTCTCAGA</b> ACTT <b>CCTGT</b> GCCTACTGCCTCGgaattc          |
| TACC3-shRNA3                                                          | ctcgagAAGGTATATTGCTGTTGACAGTGAGCGCTCCAGAAAGTTCTAAAAGAAA<br>tagtgaagccacagatgta <b>TTTCTTTT</b> <b>AGA</b> ACTT <b>TTCTGG</b> ATTGCCTACTGCCTCGgaattc |
